# Supplementary material for: Dissolved organic matter fosters core mercury-methylating microbiome for methylmercury production in paddy soils
Source: Copernicus journal article supplement (doi:10.5194/egusphere-2024-590), 2024-06-12
Supplement: Supplementary file 1 [file egusphere-2024-590-supplement.pdf]

1 *Supplement of*

2 **Dissolved organic matter fosters core**  
3 **mercury-methylating microbiome for methylmercury**  
4 **production in paddy soils**

5 **Qiang Pu et al.**

6 *Correspondence to:* Bo Meng (mengbo@mail.gyig.ac.cn)

## 7 **Supplementary Texts**

### 8 **Text S1. Measurement of soil physico-chemical properties, mercury and dissolved organic matter.**

#### 9 **S1.1 Characterization of soil physico-chemical properties.**

10 Soil pH was measured using a pH meter (PD-501, SANXIN, China) after extraction with ultrapure  
11 deionized water (soil: water = 1:2.5 w/v). Soil total carbon and total nitrogen were measured by an  
12 organic elemental analyzer (vario MACRO cube, Elementar, Germany). Water-soluble  $\text{SO}_4^{2-}$  was  
13 extracted with ultrapure deionized water (soil: water = 1:10 w/v) by a horizontal oscillator at 220 rpm for  
14 16 h in the dark. The supernatant solution was obtained by centrifugation ( $2500 \times g$  for 10 min) and  
15 filtration (0.45  $\mu\text{m}$ , PES, Bizcomr, China). Water-soluble  $\text{SO}_4^{2-}$  was analyzed with a UV-Vis  
16 spectrophotometer (UV-5100B, METASH, China). Water-soluble  $\text{NO}_3^-$  was extracted with 2 M KCl,  
17 filtered using PES membranes (0.45  $\mu\text{m}$ , Bizcomr, China), and measured by UV spectrophotometry  
18 (UV-1200, Macy Analysis Instrument Co. Ltd., China). The  $\text{S}^{2-}$  and  $\text{Fe}^{2+}$  in soil pore water were obtained  
19 by centrifugation ( $3500 \times g$  for 15 min). The  $\text{S}^{2-}$  in soil pore water was measured by using methylene blue  
20 method (Cline, 1969), with a detection limit of 0.13  $\mu\text{M}$ . The  $\text{Fe}^{2+}$  in soil pore water was measured by  
21 using ferrozine method (Viollier et al., 2000), with a detection of 10  $\mu\text{M}$ .

#### 22 **S1.2 Analysis of mercury.**

23 The water-soluble Hg concentration (representing Hg bioavailability) in paddy soils was determined  
24 according to Shi et al. with slight modifications (Shi et al., 2005). Briefly, ~0.5 g of soil was extracted in  
25 8 mL of Milli-Q water with continuous agitation for 2 h. The suspension was centrifuged at 2850 g for 30  
26 min and vacuum filtered through 0.45- $\mu\text{m}$  mixed cellulose acetate filters (Whatman, USA). The amount  
27 of water-soluble Hg in solution was measured by cold vapor atomic fluorescence spectrometry (CVAFS,  
28 Brooks Rand Model III, Brooks Rand Laboratories) according to USEPA method 1631 (EPA, 2002). To  
29 determine total Hg (THg), ~0.2 g of soil was digested in 5 mL of freshly prepared aqua regia ( $\text{HCl}:\text{HNO}_3$   
30 = 3:1 v/v) with 5 mL of Milli-Q water at 95  $^\circ\text{C}$  for 55 mins. The total Hg amount in the digest solution  
31 was measured by cold vapor atomic fluorescence spectrometry (CVAFS, Brooks Rand Model III, Brooks  
32 Rand Laboratories) according to USEPA method 1631 (EPA, 2002). Approximately 0.3-0.4 g of soil was  
33 extracted using  $\text{CuSO}_4$ -methanol solvent for MeHg quantification via gas chromatography CVAFS

34 (GC-CVAFS, Brooks Rand Model III, Brooks Rand Laboratories) following the procedure of USEPA  
35 method 1630 (EPA, 2001). To ensure the accuracy of THg and MeHg quantification in soils, method  
36 blanks and standard reference materials, GSS-5 (THg:  $290 \pm 30 \text{ ng g}^{-1}$ ) and ERMCC580 (MeHg:  $75.5 \pm$   
37  $3.7 \text{ ng g}^{-1}$ ), were analyzed. The THg and MeHg recoveries from GSS-5 and ERMCC580 were  $113.0\% \pm$   
38  $7.1\%$  (n=6) and  $103.6\% \pm 3.5\%$  (n = 3), respectively. The relative standard deviation (RSD%) for THg  
39 and MeHg analysis in triplicate was less than 5.2% and 3.9%, respectively.

### 40 **S1.3 Analysis of dissolved organic matter concentration and composition.**

41 The concentration of soil dissolved organic matter (DOM, reflected by water-soluble DOC) was  
42 extracted with Milli-Q water (soil: water = 1:10 w/v), filtered (0.45  $\mu\text{m}$  Polypropylene Membrane Filters)  
43 and determined using a total organic carbon analyzer (Vario TOC cube, Elementar, Germany). The  
44 dissolved organic matter composition (reflected by optical properties of DOM) was characterized with  
45 UV-Vis absorption through Aqualog® absorption-fluorescence spectroscopy (Jobin Yvon, Horiba,  
46 Japan). UV-Vis absorption spectra for liquid samples were scanned from 230 nm to 800 nm (1 nm  
47 interval) (Liu et al., 2022). Internal filtering effects were minimized via pre-measurement dilution to a  
48 DOC < 10 mg/L (Jiang et al., 2018).  $S_R$  (spectral slope ratio over the ranges of 275-295 nm and 350-400  
49 nm) of DOM was calculated for the optical property of DOM, and the detailed calculation and  
50 description can be found in previous works (Jiang et al., 2018; Zhang et al., 2023).

### 51 **S1.4 Analysis of low-molecular-weight organic acids.**

52 Soils from NMS, MMS and HMS were selected for analysis of low-molecular-weight organic acids. Soil  
53 (~10 g) was extracted with 20 mL milli-Q water for 12 h. The mixture was centrifuged at  $15\,000 \times g$  for  
54 15 min, and filtered through Whatman No. 42. Water-soluble low-molecular-weight organic acids were  
55 obtained by evaporating the solvent to dryness in a rotary evaporator at 40 °C and redissolving the residue  
56 in 1 mL of Mill-Q water. The water-soluble low-molecular-weight organic acids were identified and  
57 quantified by using reversed-phase high-performance liquid chromatography (HPLC, Shimadzu LC-20,  
58 Shimadzu, Osaka, Japan) with a diode array detector (van Hees et al., 1999).

59 **Text S2. *hgcA* gene quantification.**

60 The abundance of the *hgcA* gene was quantified with primer set ORNL-Delta-HgcA-F:  
61 GCCAACTACAAGMTGASCTWC and ORNL-Delta-HgcA-R: CCSGCNGCRCACCAGACRTT in  
62 AB 7500 (Applied Biosystems, USA). The PCR setup was as follows: 10 µl of SYBR Premix Ex Taq  
63 (TaKaRa Bio Inc., Japan), 0.5 µL (10 mM) of each primer, 2 µL of diluted DNA template (~20 ng), and 7  
64 µL of sterilized DDW (double distilled water). The *hgcA* gene was quantified in triplicate under the  
65 following thermal cycles: 3 min initial denaturation at 95°C, 40 cycles of 15 s at 95°C, 15 s at 50°C, and  
66 15 s at 55°C, and 4 min at 72°C, followed by a plate read at 83 °C (Liu et al., 2018). Three no-template  
67 controls were used to detect contamination during the amplification process.

68 **Text S3. Bacterial culture and validation experiment.**

69 *Geobacter sulfurreducens* PCA was cultured in nutrient broth (NB) at 33°C (Hu et al., 2013). Cells were  
70 harvested at the middle log phase and washed three times with phosphate buffered saline (PBS,  
71 containing 0.137 M sodium chloride, 0.0027 M potassium chloride, 0.01 M sodium phosphate dibasic,  
72 and 0.0018 M potassium phosphate monobasic, pH 7.4) media before the validation experiment.

73 The validation experiment was conducted in PBS medium amended with 5 mL of natural DOM  
74 solution extracted from paddy soils (i.e., NMS, MMS and HMS), 5 nM Hg(II), and a cell density of  
75  $2 \times 10^8$  cells mL<sup>-1</sup>. The natural DOM extraction method referred to the procedure described in Text [S1.3](#).  
76 All vials were immediately sealed with caps and kept in the dark on shaker. After incubation for 24 h at  
77 33°C, triplicate sample vials were remove from the shaker and preserved at 4°C. An aliquot (10 mL) was  
78 filtered through 0.45 µm polyethersulfone (PES) membranes and analyzed for DOM concentration via  
79 total organic carbon analyzer (Vario TOC cube, Elementar, Germany). Another aliquot of the sample (3  
80 mL) was acidified with trace metal grade HCl (0.2% (v/v)) and acetic acid (0.5% (v/v)), and analyzed for  
81 MeHg. The remaining aliquot was oxidized overnight in BrCl (1% (v/v)) and analyzed for total Hg. Total  
82 Hg and MeHg were measured by CVAFS (Brooks Rand Model III, Brooks Rand Laboratories) and cold  
83 vapor atomic fluorescence spectrometry (CVAFS, Brooks Rand Model III, Brooks Rand Laboratories),  
84 respectively (EPA, 2001; 2002).

85 Treatment with HgCl<sub>2</sub> and natural DOM solution was used to monitor abiotic Hg methylation. The  
86 experimental procedures were consistent with the aforementioned experiment.

87 **Supplementary Figures**

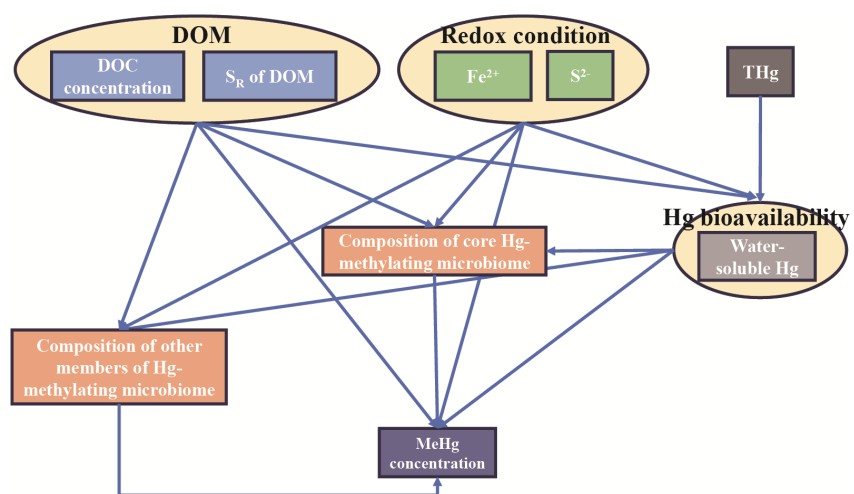

88

89 **Fig. S1.** *A priori* models for the structure equation models of variation in MeHg production based on the  
90 hypothesized causal relationships between multiple factors and MeHg production.

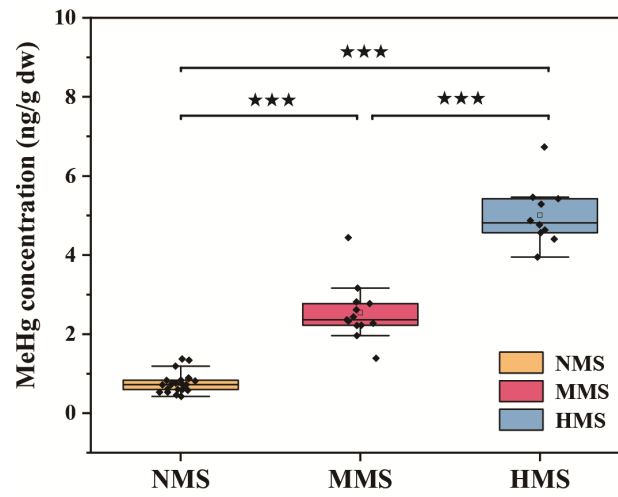

91  
 92 **Fig. S2.** Soil MeHg concentration in paddy soils. NMS, non-Hg polluted paddy soils (n = 23); MMS,  
 93 moderate Hg-polluted paddy soils (n = 13); HMS, high Hg-polluted paddy soils (n = 10). "★★★"  
 94 represents significant difference between different paddy soils ( $p < 0.001$ ).

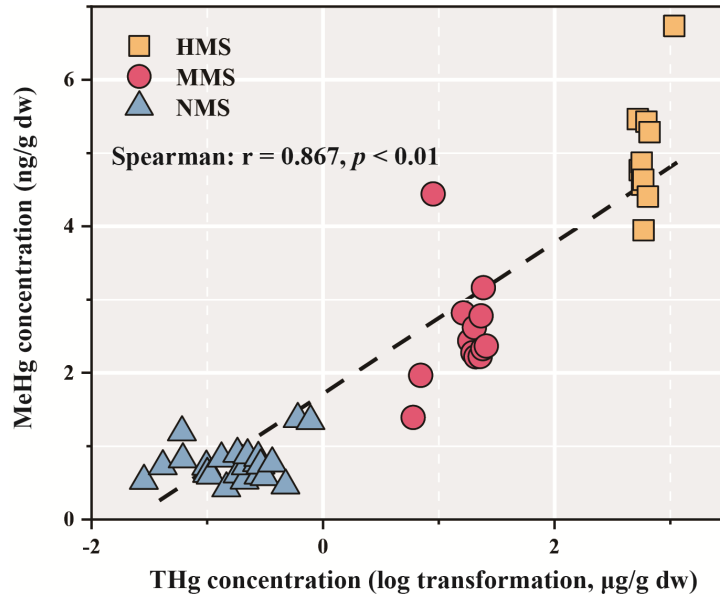

95

96 **Fig. S3.** Correlation between THg and MeHg concentration in paddy soils. NMS, non-Hg polluted paddy  
 97 soils (n = 23); MMS, moderate Hg-polluted paddy soils (n = 13); HMS, high Hg-polluted paddy soils (n  
 98 = 10).



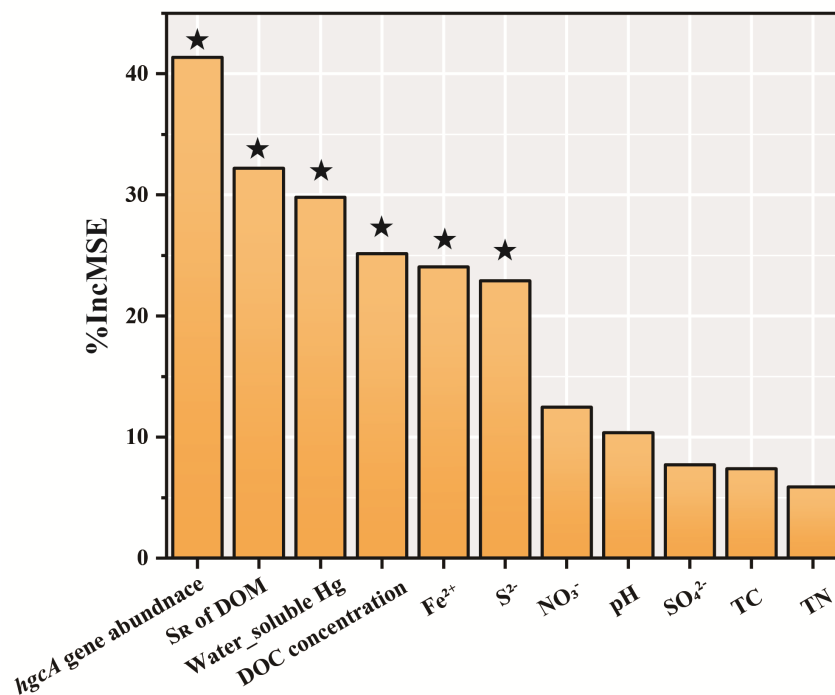

99

100 **Fig. S4.** Random forest modeling indicating the importance of different predictors for MeHg production.

101 The number of trees used in model is 5000. "★" represents a significant difference ( $p < 0.05$ ).

102

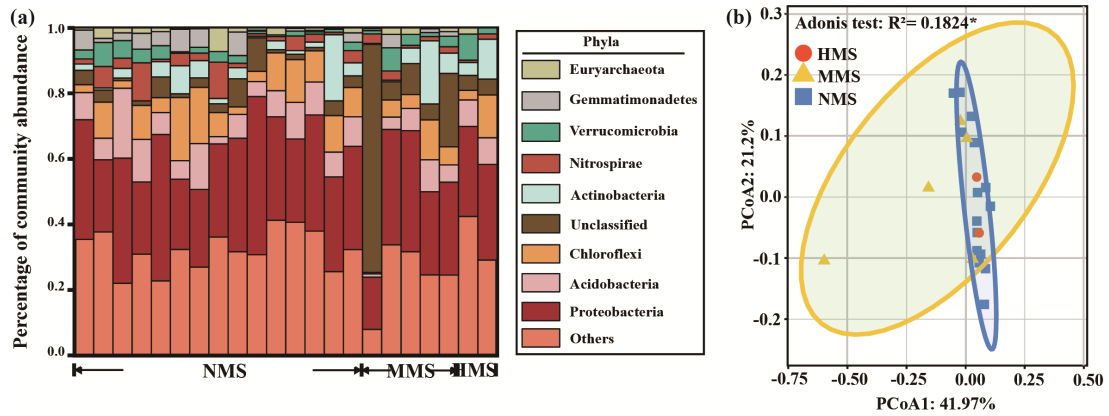

103

104

105 **Fig. S5. (a)** Taxonomic profiles of Hg-methylating microbial communities in different paddy soils. Phyla

106

with low abundance phyla grouped together under "other phyla". **(b)** Principal coordinates analysis

107

(PCoA) based on Bray-curtis distance showing the overall pattern of Hg-methylating microbial

108

communities in paddy soils. NMS, non-Hg polluted paddy soils (n = 15); MMS, moderate Hg-polluted

paddy soils (n = 5); HMS, high Hg-polluted paddy soils (n = 2).

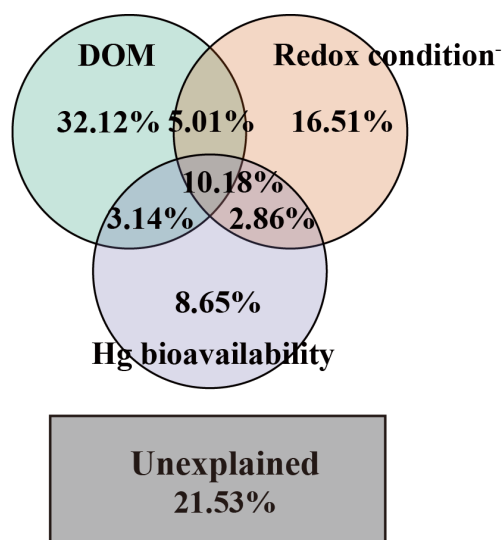

109

110 **Fig. S6.** Variation partitioning analysis differentiating effects of DOM, redox conditions, and Hg  
 111 bioavailability on core Hg-methylating microbiome composition. DOM is reflected by DOM  
 112 concentration and composition, which are measured as water-soluble DOC concentration and  $S_R$   
 113 (spectral slope ratio of  $S_{275-295}:S_{350-400}$ ) values of DOM. Redox conditions are reflected by soil  $Fe^{2+}$  and  
 114  $S^{2-}$ , which are measured as concentrations of  $Fe^{2+}$  and  $S^{2-}$  in soil pore water. Hg bioavailability is  
 115 reflected by water-soluble Hg. It should be noted that  $Fe^{2+}$  and  $S^{2-}$  data were limited to the soil samples  
 116 obtained in August 2022.

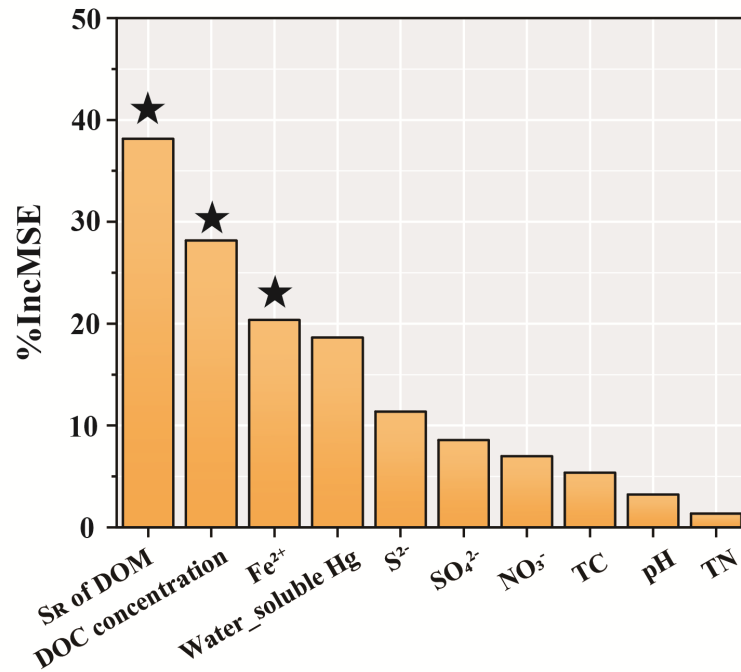

117

118 **Fig. S7.** Random forest modeling indicating the importance of different predictors for core  
 119 Hg-methylating microbiome composition. The number of trees used in model is 5000. "★" represents a  
 120 significant difference ( $p < 0.05$ ).

121 **Supplementary Tables**122 **Table S1.** Detailed information for paddy soils collected from 12 provinces across China.

| Sample | Province  | Site  | Longitude  | Latitude  | Total Hg<br>( $\mu\text{g/g}$ ) | Sampling<br>time | Category |
|--------|-----------|-------|------------|-----------|---------------------------------|------------------|----------|
| S1     | Guizhou   | HX-1  | 106°31'34" | 26°25'15" | 0.22                            | Sep. 2020        | NMS      |
| S2     | Guizhou   | HX-2  | 106°31'20" | 26°25'18" | 0.27                            | Sep. 2020        | NMS      |
| S3     | Guizhou   | HX-3  | 106°31'21" | 26°25'15" | 0.29                            | Sep. 2020        | NMS      |
| S4     | Guizhou   | HX-4  | 106°31'28" | 26°25'16" | 0.31                            | Sep. 2020        | NMS      |
| S5     | Guizhou   | HX-5  | 106°31'19" | 26°25'17" | 0.28                            | Sep. 2020        | NMS      |
| S6     | Guizhou   | HX-6  | 106°31'26" | 26°25'21" | 0.28                            | Sep. 2020        | NMS      |
| S7     | Guizhou   | HX-7  | 106°31'31" | 26°25'20" | 0.36                            | Sep. 2020        | NMS      |
| S8     | Guizhou   | HX-8  | 106°31'28" | 26°25'14" | 0.18                            | Sep. 2020        | NMS      |
| S9     | Guizhou   | HX-9  | 106°31'15" | 26°25'19" | 0.21                            | Sep. 2020        | NMS      |
| S10    | Guizhou   | GX-1  | 109°09'25" | 27°33'23" | 19.74                           | Sep. 2020        | MMS      |
| S11    | Guizhou   | GX-2  | 109°11'22" | 27°33'37" | 24.3                            | Sep. 2020        | MMS      |
| S12    | Guizhou   | GX-3  | 109°10'09" | 27°33'36" | 20.24                           | Sep. 2020        | MMS      |
| S13    | Guizhou   | GX-4  | 109°12'42" | 27°33'53" | 23.94                           | Sep. 2020        | MMS      |
| S14    | Guizhou   | GX-5  | 109°11'02" | 27°33'28" | 22.79                           | Sep. 2020        | MMS      |
| S15    | Guizhou   | GX-6  | 109°13'38" | 27°33'56" | 25.67                           | Sep. 2020        | MMS      |
| S16    | Guizhou   | GX-7  | 109°10'35" | 27°33'33" | 23.25                           | Sep. 2020        | MMS      |
| S17    | Guizhou   | GX-8  | 109°09'55" | 27°33'43" | 20.86                           | Sep. 2020        | MMS      |
| S18    | Guizhou   | GX-9  | 109°09'12" | 27°33'31" | 18.56                           | Sep. 2020        | MMS      |
| S19    | Guizhou   | SK-1  | 109°12'34" | 27°30'41" | 639.87                          | Sep. 2020        | HMS      |
| S20    | Guizhou   | SK-2  | 109°12'48" | 27°31'05" | 586.56                          | Sep. 2020        | HMS      |
| S21    | Guizhou   | SK-3  | 109°12'24" | 27°30'36" | 524.16                          | Sep. 2020        | HMS      |
| S22    | Guizhou   | SK-4  | 109°12'27" | 27°30'25" | 543.04                          | Sep. 2020        | HMS      |
| S23    | Guizhou   | SK-5  | 109°12'35" | 27°30'39" | 583.72                          | Sep. 2020        | HMS      |
| S24    | Guizhou   | SK-6  | 109°12'18" | 27°30'50" | 567.14                          | Sep. 2020        | HMS      |
| S25    | Guizhou   | SK-7  | 109°12'30" | 27°30'52" | 621.2                           | Sep. 2020        | HMS      |
| S26    | Guizhou   | SK-8  | 109°12'38" | 27°30'55" | 570.8                           | Sep. 2020        | HMS      |
| S27    | Guizhou   | SK-9  | 109°12'49" | 27°31'02" | 661.62                          | Sep. 2020        | HMS      |
| S28    | Jilin     | 5N-3  | 125°57'0"  | 43°42'54" | 0.03                            | Aut. 2022        | NMS      |
| S29    | Jilin     | 5N-8  | 125°44'7"  | 44°6'26"  | 0.06                            | Aut. 2022        | NMS      |
| S30    | Liaoning  | 5M-5  | 123°6'45"  | 41°49'46" | 0.04                            | Aut. 2022        | NMS      |
| S31    | Hubei     | 3I-1  | 113°10'48" | 29°31'48" | 0.06                            | Aut. 2022        | NMS      |
| S32    | Guangxi   | 1A-28 | 108°45'58" | 21°48'23" | 0.1                             | Aut. 2022        | NMS      |
| S33    | Hunan     | 3I-11 | 112°24'0"  | 28°34'12" | 0.1                             | Aut. 2022        | NMS      |
| S34    | Guangdong | 1B-14 | 110°43'25" | 21°51'23" | 0.11                            | Aut. 2022        | NMS      |
| S35    | Guangxi   | 1A-22 | 110°14'59" | 22°21'20" | 0.13                            | Aut. 2022        | NMS      |
| S36    | Sichuan   | 3K-3  | 104°20'24" | 30°49'12" | 0.15                            | Aut. 2022        | NMS      |
| S37    | Guizhou   | 4G-15 | 106°20'28" | 26°25'59" | 0.18                            | Aut. 2022        | NMS      |
| S38    | Jiangsu   | 2E-11 | 119°9'29"  | 33°28'45" | 0.21                            | Aut. 2022        | NMS      |
| S39    | Hunan     | 3I-18 | 109°38'24" | 28°37'12" | 0.48                            | Aut. 2022        | NMS      |
| S40    | Guangxi   | 1A-1  | 109°45'33" | 23°11'26" | 0.61                            | Aut. 2022        | NMS      |
| S41    | Zhejiang  | 2D-5  | 119°41'31" | 30°19'6"  | 0.78                            | Aut. 2022        | NMS      |
| S42    | Liaoning  | 5M-1  | 123°7'9"   | 41°19'15" | 6.01                            | Aut. 2022        | MMS      |
| S43    | Shaanxi   | 6Q-23 | 109°27'55" | 33°5'1"   | 7                               | Aut. 2022        | MMS      |
| S44    | Guizhou   | 4G-8  | 109°24'38" | 27°39'59" | 8.95                            | Aut. 2022        | MMS      |
| S45    | Guizhou   | 4G-7  | 109°15'13" | 27°31'58" | 16.34                           | Aut. 2022        | MMS      |
| S46    | Chongqing | 3J-1  | 108°55'12" | 28°37'48" | 1079.75                         | Aut. 2022        | HMS      |

123 Paddy soils were divided into three categories according to mercury concentration: NMS, non-Hg polluted soils;

124 MMS, moderate Hg-polluted soils; HMS, high Hg-polluted soils. Aut., August; Sep., September.

125 **Table S2.** Characterization of dissolved organic matter (DOM) in paddy soils.

| Sample | Category | Site  | DOM                                    |                     | DOM composition <sup>a</sup> |      |      |      |
|--------|----------|-------|----------------------------------------|---------------------|------------------------------|------|------|------|
|        |          |       | concentration<br>(g kg <sup>-1</sup> ) | SUVA <sub>254</sub> | S <sub>R</sub>               | BIX  | FI   | HIX  |
| S1     | NMS      | HX-1  | 0.36                                   | 1.21                | 1.9                          | 0.63 | 1.48 | 0.8  |
| S2     | NMS      | HX-2  | 0.36                                   | 0.65                | 0.54                         | 0.69 | 1.57 | 0.7  |
| S3     | NMS      | HX-3  | 0.37                                   | 0.85                | 1                            | 0.66 | 1.57 | 0.73 |
| S4     | NMS      | HX-4  | 0.43                                   | 1.27                | 1.28                         | 0.6  | 1.48 | 0.78 |
| S5     | NMS      | HX-5  | 0.38                                   | 0.6                 | 1.2                          | 0.7  | 1.57 | 0.71 |
| S6     | NMS      | HX-6  | 0.38                                   | 1.5                 | 0.99                         | 0.61 | 1.47 | 0.83 |
| S7     | NMS      | HX-7  | 0.43                                   | 0.81                | 1.2                          | 0.64 | 1.53 | 0.76 |
| S8     | NMS      | HX-8  | 0.36                                   | 0.6                 | 0.51                         | 0.7  | 1.57 | 0.71 |
| S9     | NMS      | HX-9  | 0.34                                   | 1.32                | 1.7                          | 0.66 | 1.53 | 0.76 |
| S10    | MMS      | GX-1  | 0.36                                   | 1.12                | 0.77                         | 0.51 | 1.55 | 0.99 |
| S11    | MMS      | GX-2  | 0.36                                   | 0.97                | 0.82                         | 0.52 | 1.54 | 0.98 |
| S12    | MMS      | GX-3  | 0.36                                   | 0.09                | 0.79                         | 0.5  | 1.37 | 0.88 |
| S13    | MMS      | GX-4  | 0.39                                   | 1.14                | 0.93                         | 0.52 | 1.4  | 0.98 |
| S14    | MMS      | GX-5  | 0.38                                   | 1.03                | 0.92                         | 0.5  | 1.42 | 1    |
| S15    | MMS      | GX-6  | 0.38                                   | 1.01                | 0.97                         | 0.6  | 1.59 | 0.93 |
| S16    | MMS      | GX-7  | 0.37                                   | 0.63                | 0.84                         | 0.58 | 1.5  | 0.85 |
| S17    | MMS      | GX-8  | 0.37                                   | 1.08                | 0.82                         | 0.54 | 1.42 | 0.87 |
| S18    | MMS      | GX-9  | 0.38                                   | 1.14                | 0.89                         | 0.58 | 1.5  | 0.77 |
| S19    | HMS      | SK-1  | 0.21                                   | 1.04                | 0.42                         | 0.51 | 1.17 | 0.75 |
| S20    | HMS      | SK-2  | 0.2                                    | 1.08                | 0.39                         | 0.52 | 1.19 | 0.72 |
| S21    | HMS      | SK-3  | 0.32                                   | 1.32                | 0.57                         | 0.44 | 1.08 | 0.77 |
| S22    | HMS      | SK-4  | 0.19                                   | 1.53                | 0.39                         | 0.62 | 1.24 | 0.56 |
| S23    | HMS      | SK-5  | 0.33                                   | 1.15                | 0.6                          | 0.45 | 1.2  | 0.78 |
| S24    | HMS      | SK-6  | 0.31                                   | 1.48                | 0.35                         | 0.45 | 1.12 | 0.7  |
| S25    | HMS      | SK-7  | 0.28                                   | 1.59                | 0.56                         | 0.42 | 1.06 | 0.77 |
| S26    | HMS      | SK-8  | 0.32                                   | 1.16                | 0.35                         | 0.53 | 1.2  | 0.74 |
| S27    | HMS      | SK-9  | 0.27                                   | 1.15                | 0.49                         | 0.45 | 1.2  | 0.78 |
| S28    | NMS      | 5N-3  | 0.61                                   | 0.16                | 1.2                          | 0.76 | 1.63 | 0.95 |
| S29    | NMS      | 5N-8  | 0.56                                   | 0.12                | 4.1                          | 0.76 | 1.57 | 1    |
| S30    | NMS      | 5M-5  | 0.54                                   | 0.33                | 1.21                         | 0.94 | 1.69 | 0.91 |
| S31    | NMS      | 3I-1  | 0.5                                    | 0.31                | 1.13                         | 0.63 | 1.63 | 0.84 |
| S32    | NMS      | 1A-28 | 0.64                                   | 1.11                | 0.86                         | 0.57 | 1.47 | 0.93 |
| S33    | NMS      | 3I-11 | 0.51                                   | 0.23                | 1.21                         | 0.65 | 1.64 | 0.9  |
| S34    | NMS      | 1B-14 | 0.55                                   | 0.18                | 1.72                         | 0.57 | 1.77 | 0.86 |
| S35    | NMS      | 1A-22 | 0.51                                   | 0.22                | 2.87                         | 0.83 | 1.66 | 0.79 |
| S36    | NMS      | 3K-3  | 0.58                                   | 0.74                | 1.34                         | 0.54 | 1.5  | 0.89 |
| S37    | NMS      | 4G-15 | 0.33                                   | 0.38                | 1.47                         | 0.56 | 1.56 | 0.95 |
| S38    | NMS      | 2E-11 | 0.5                                    | 0.68                | 1.2                          | 0.5  | 1.46 | 0.98 |
| S39    | NMS      | 3I-18 | 0.45                                   | 0.29                | 0.91                         | 0.55 | 1.64 | 0.9  |
| S40    | NMS      | 1A-1  | 0.89                                   | 0.17                | 1.13                         | 0.73 | 1.75 | 0.87 |
| S41    | NMS      | 2D-5  | 0.54                                   | 1.53                | 1.32                         | 0.73 | 1.97 | 0.34 |
| S42    | MMS      | 5M-1  | 0.39                                   | 0.32                | 0.84                         | 0.58 | 1.44 | 0.98 |
| S43    | MMS      | 6Q-23 | 0.42                                   | 0.39                | 1.06                         | 0.54 | 1.57 | 0.92 |
| S44    | MMS      | 4G-8  | 0.4                                    | 0.41                | 0.99                         | 0.68 | 1.64 | 0.79 |
| S45    | MMS      | 4G-7  | 0.61                                   | 0.64                | 0.93                         | 0.76 | 1.63 | 0.95 |
| S46    | HMS      | 3J-1  | 0.53                                   | 1.75                | 0.52                         | 0.55 | 1.14 | 0.62 |

126 Paddy soils were divided into three categories according to mercury concentration: NMS, non-Hg polluted soils;  
 127 MMS, moderate Hg-polluted soils; HMS, high Hg-polluted soils.

128 <sup>a</sup> SUVA<sub>254</sub> (specific UV absorbance at a wavelength of 254 nm) and S<sub>R</sub> (spectral slope ratio of S<sub>275-295</sub> : S<sub>350-400</sub>) are  
 129 properties from UV-Vis absorption spectra of DOM.

130 biological index (BIX), humification index (HIX) and fluorescence index (FI) are the fluorescence compounds and  
 131 calculated indices from EEM fluorescence spectra of DOC.

132 **Table S3.** Physicochemical properties in paddy soils

| Sample | Category | Site  | pH   | SO <sub>4</sub> <sup>2-</sup><br>(mg kg <sup>-1</sup> ) | NO <sub>3</sub> <sup>-</sup><br>(mg kg <sup>-1</sup> ) | TN<br>(%) | TC<br>(%) | S <sup>2-</sup><br>(μM) | Fe <sup>2+</sup><br>(μM) |
|--------|----------|-------|------|---------------------------------------------------------|--------------------------------------------------------|-----------|-----------|-------------------------|--------------------------|
| S1     | NMS      | HX-1  | 7.52 | 347.87                                                  | 17.67                                                  | 0.4       | 5.49      | No data                 | No data                  |
| S2     | NMS      | HX-2  | 7.53 | 369.9                                                   | 19.52                                                  | 0.28      | 3.15      | No data                 | No data                  |
| S3     | NMS      | HX-3  | 7.51 | 354.61                                                  | 18.38                                                  | 0.41      | 5.47      | No data                 | No data                  |
| S4     | NMS      | HX-4  | 7.5  | 369.68                                                  | 20.26                                                  | 0.41      | 5.5       | No data                 | No data                  |
| S5     | NMS      | HX-5  | 7.52 | 356.8                                                   | 18.73                                                  | 0.21      | 7.82      | No data                 | No data                  |
| S6     | NMS      | HX-6  | 7.54 | 351.22                                                  | 18.24                                                  | 0.29      | 3.13      | No data                 | No data                  |
| S7     | NMS      | HX-7  | 7.51 | 358.16                                                  | 18.76                                                  | 0.21      | 7.79      | No data                 | No data                  |
| S8     | NMS      | HX-8  | 7.53 | 343.73                                                  | 18.26                                                  | 0.29      | 3.15      | No data                 | No data                  |
| S9     | NMS      | HX-9  | 7.51 | 348.69                                                  | 18.21                                                  | 0.21      | 7.77      | No data                 | No data                  |
| S10    | MMS      | GX-1  | 7.52 | 348.01                                                  | 17.62                                                  | 0.42      | 5.72      | No data                 | No data                  |
| S11    | MMS      | GX-2  | 7.52 | 349.67                                                  | 17.55                                                  | 0.21      | 7.99      | No data                 | No data                  |
| S12    | MMS      | GX-3  | 7.5  | 337.66                                                  | 17.57                                                  | 0.42      | 5.74      | No data                 | No data                  |
| S13    | MMS      | GX-4  | 7.5  | 371.17                                                  | 17.78                                                  | 0.28      | 3.21      | No data                 | No data                  |
| S14    | MMS      | GX-5  | 7.49 | 335.06                                                  | 17.63                                                  | 0.43      | 5.71      | No data                 | No data                  |
| S15    | MMS      | GX-6  | 7.5  | 381.51                                                  | 17.79                                                  | 0.27      | 3.19      | No data                 | No data                  |
| S16    | MMS      | GX-7  | 7.5  | 333.01                                                  | 17.6                                                   | 0.47      | 6.08      | No data                 | No data                  |
| S17    | MMS      | GX-8  | 7.51 | 377.65                                                  | 17.55                                                  | 0.21      | 7.88      | No data                 | No data                  |
| S18    | MMS      | GX-9  | 7.5  | 339.97                                                  | 17.5                                                   | 0.21      | 7.93      | No data                 | No data                  |
| S19    | HMS      | SK-1  | 7.51 | 254.52                                                  | 15.65                                                  | 0.48      | 6.12      | No data                 | No data                  |
| S20    | HMS      | SK-2  | 7.48 | 255.55                                                  | 14.58                                                  | 0.21      | 7.84      | No data                 | No data                  |
| S21    | HMS      | SK-3  | 7.47 | 266.23                                                  | 16.1                                                   | 0.46      | 6.1       | No data                 | No data                  |
| S22    | HMS      | SK-4  | 7.45 | 271.33                                                  | 15.52                                                  | 0.32      | 4.71      | No data                 | No data                  |
| S23    | HMS      | SK-5  | 7.51 | 251.63                                                  | 15.56                                                  | 0.28      | 7.92      | No data                 | No data                  |
| S24    | HMS      | SK-6  | 7.45 | 256.33                                                  | 14.92                                                  | 0.29      | 3.14      | No data                 | No data                  |
| S25    | HMS      | SK-7  | 7.48 | 246.24                                                  | 16.06                                                  | 0.46      | 6.07      | No data                 | No data                  |
| S26    | HMS      | SK-8  | 7.45 | 241.53                                                  | 14.5                                                   | 0.22      | 7.89      | No data                 | No data                  |
| S27    | HMS      | SK-9  | 7.47 | 219.44                                                  | 16.4                                                   | 0.21      | 3.18      | No data                 | No data                  |
| S28    | NMS      | 5N-3  | 7.36 | 393.09                                                  | 15.91                                                  | 0.25      | 2.71      | 0.87                    | 16752.81                 |
| S29    | NMS      | 5N-8  | 7.68 | 291.38                                                  | 18.36                                                  | 0.18      | 6.73      | 0.28                    | 20058.81                 |
| S30    | NMS      | 5M-5  | 6.84 | 421.42                                                  | 7.98                                                   | 0.18      | 6.7       | 0.38                    | 34030.78                 |
| S31    | NMS      | 3I-1  | 7.11 | 296.93                                                  | 17.07                                                  | 0.24      | 2.76      | 0.92                    | 8490.57                  |
| S32    | NMS      | 1A-28 | 6.95 | 278.44                                                  | 17.39                                                  | 0.36      | 4.94      | 1.31                    | 19670.1                  |
| S33    | NMS      | 3I-11 | 6.84 | 293.2                                                   | 18.57                                                  | 0.24      | 2.71      | 2.21                    | 3476.21                  |
| S34    | NMS      | 1B-14 | 6.88 | 286.05                                                  | 17.68                                                  | 0.18      | 6.82      | 1.38                    | 10140.85                 |
| S35    | NMS      | 1A-22 | 7.48 | 282.71                                                  | 17.03                                                  | 0.18      | 6.87      | 1.13                    | 3147.96                  |
| S36    | NMS      | 3K-3  | 7.01 | 206.27                                                  | 14.03                                                  | 0.41      | 5.26      | 2.06                    | 1869.54                  |
| S37    | NMS      | 4G-15 | 7.06 | 268.33                                                  | 16.82                                                  | 0.18      | 6.68      | 0.87                    | 77.94                    |
| S38    | NMS      | 2E-11 | 6.54 | 290.39                                                  | 16.03                                                  | 0.23      | 2.74      | 0.72                    | 1567.21                  |
| S39    | NMS      | 3I-18 | 7.01 | 293.8                                                   | 18.55                                                  | 0.37      | 4.91      | 0.46                    | 3912.43                  |
| S40    | NMS      | 1A-1  | 7.12 | 273.16                                                  | 15.44                                                  | 0.18      | 6.78      | 0.55                    | 44307.05                 |
| S41    | NMS      | 2D-5  | 7.03 | 185.56                                                  | 18.12                                                  | 0.4       | 5.23      | 0.48                    | 64217.64                 |
| S42    | MMS      | 5M-1  | 6.88 | 250.39                                                  | 17.8                                                   | 0.36      | 4.92      | 0.85                    | 2849.95                  |
| S43    | MMS      | 6Q-23 | 7.05 | 394.55                                                  | 8.76                                                   | 0.25      | 2.69      | 0.55                    | 3031.35                  |
| S44    | MMS      | 4G-8  | 7.52 | 292.47                                                  | 18.19                                                  | 0.35      | 4.7       | 0.17                    | 7086.89                  |
| S45    | MMS      | 4G-7  | 5.57 | 289.84                                                  | 18.25                                                  | 0.34      | 4.72      | 0.85                    | 17456.81                 |
| S46    | HMS      | 3J-1  | 6.18 | 436.82                                                  | 18.86                                                  | 0.35      | 4.73      | 0.75                    | 4433.16                  |

133 Paddy soils were divided into three categories according to mercury concentration: NMS, non-Hg polluted soils;  
134 MMS, moderate Hg-polluted soils; HMS, high Hg-polluted soils. No data indicate that the concentrations of S<sup>2-</sup> and  
135 Fe<sup>2+</sup> were unavailable in soil samples from September 2020 (S1-S26).

136 **Table S4.** Key characteristics of co-occurrence networks in paddy soils.

| Category | Connected nodes | Edges | Module | Average degree | Network diameter | Modularity index |
|----------|-----------------|-------|--------|----------------|------------------|------------------|
| NMS      | 199             | 3062  | 6      | 15.31          | 9                | 0.554            |
| MMS      | 193             | 1655  | 11     | 8.275          | 7                | 0.583            |
| HMS      | 189             | 1714  | 11     | 8.57           | 7                | 0.591            |

137 NMS, non-Hg polluted paddy soils (n = 23); MMS, moderate Hg-polluted paddy soils (n = 13); HMS, high  
 138 Hg-polluted paddy soils (n = 10).



**Table S5.** Identification of major module (also known as core microbiome) in different paddy soils.

| ID  | Module   | The number of connections to other modules | Relative abundance (%) | Correlation with MeHg concentration | Correlation with %MeHg |
|-----|----------|--------------------------------------------|------------------------|-------------------------------------|------------------------|
| NMS | module1  | 146                                        | 34                     | 0.418*                              | 0.787***               |
|     | module2  | 13                                         | 23.5                   | 0.164                               | -0.374                 |
|     | module3  | 28                                         | 19                     | 0.206                               | -0.31                  |
|     | module4  | 3                                          | 16.5                   | 0.189                               | -0.256                 |
|     | module5  | 17                                         | 6.5                    | 0.116                               | -0.186                 |
|     | module6  | 0                                          | 0.5                    | 0.047                               | -0.05                  |
| MMS | module1  | 66                                         | 27.5                   | 0.503*                              | 0.863**                |
|     | module2  | 84                                         | 20.5                   | 0.035                               | -0.165                 |
|     | module3  | 8                                          | 17.5                   | -0.103                              | 0.066                  |
|     | module4  | 59                                         | 9                      | 0.068                               | 0.051                  |
|     | module5  | 5                                          | 8                      | 0.206                               | -0.204                 |
|     | module6  | 5                                          | 5.5                    | -0.049                              | 0.106                  |
|     | module7  | 5                                          | 3                      | -0.085                              | 0.04                   |
|     | module8  | 3                                          | 2.5                    | 0.039                               | -0.065                 |
|     | module9  | 0                                          | 2                      | 0.101                               | -0.169                 |
|     | module10 | 1                                          | 1                      | -0.008                              | 0.016                  |
|     | module11 | 0                                          | 3.5                    | 0.026                               | -0.064                 |
| HMS | module1  | 161                                        | 20                     | 0.410*                              | 0.872**                |
|     | module2  | 120                                        | 18.5                   | -0.351                              | 0.531                  |
|     | module3  | 0                                          | 16.5                   | 0.318                               | -0.518                 |
|     | module4  | 25                                         | 9.5                    | -0.113                              | 0.219                  |
|     | module5  | 43                                         | 9                      | -0.259                              | 0.654*                 |
|     | module6  | 29                                         | 7.5                    | -0.302                              | 0.518                  |
|     | module7  | 0                                          | 5                      | -0.101                              | 0.215                  |
|     | module8  | 0                                          | 3.5                    | 0.002                               | -0.008                 |
|     | module9  | 0                                          | 1.5                    | -0.029                              | 0.126                  |
|     | module10 | 0                                          | 1.5                    | -0.106                              | 0.204                  |
|     | module11 | 0                                          | 7.5                    | 0.284                               | -0.579                 |

140 NMS, non-Hg polluted paddy soils (n = 23); MMS, moderate Hg-polluted paddy soils (n = 13); HMS, high  
 141 Hg-polluted paddy soils (n = 10).

142

143

144 **References:**

- 145 Cline, J. D.: Spectrophotometric determination of hydrogen sulfide in natural waters<sup>1</sup>, *Limnol.*  
146 *Oceanogr.*, 14, 454-458, <https://doi.org/10.4319/lo.1969.14.3.0454>, 1969.
- 147 EPA, U.: Method 1630: Methyl Mercury in Water by Distillation, Aqueous Ethylation, Purge and Trap,  
148 and Cold Vapor Atomic Fluorescence Spectrometry CVAFS (EPA-821-R-01-020), United States  
149 Environmental Protection Agency, Washington, DC,  
150 [https://www.epa.gov/sites/default/files/2015-08/documents/method\\_1630\\_1998.pdf](https://www.epa.gov/sites/default/files/2015-08/documents/method_1630_1998.pdf), 2001.
- 151 EPA, U.: Method 1631, Revision E: Mercury in Water by Oxidation, Purge and Trap, and Cold Vapor  
152 Atomic Fluorescence Spectrometry (EPA-821-R-02-019), United States Environmental Protection  
153 Agency, Washington, DC,  
154 [https://www.epa.gov/sites/default/files/2015-08/documents/method\\_1631e\\_2002.pdf](https://www.epa.gov/sites/default/files/2015-08/documents/method_1631e_2002.pdf), 2002.
- 155 Hu, H., Lin, H., Zheng, W., Tomanicek, S. J., Johs, A., Feng, X., Elias, D. A., Liang, L., and Gu, B.:  
156 Oxidation and methylation of dissolved elemental mercury by anaerobic bacteria, *Nat. Geosci.*, 6,  
157 751-754, <https://doi.org/10.1038/ngeo1894>, 2013.
- 158 Jiang, T., Bravo, A. G., Skyllberg, U., Björn, E., Wang, D. Y., Yan, H., and Green, N. W.: Influence of  
159 dissolved organic matter (DOM) characteristics on dissolved mercury (Hg) species composition in  
160 sediment porewater of lakes from southwest China, *Water Res.*, 146, 146-158,  
161 <https://doi.org/10.1016/j.watres.2018.08.054>, 2018.
- 162 Liu, J., Zhao, L., Kong, K., Abdelhafiz, M. A., Tian, S., Jiang, T., Meng, B. and Feng, X.: Uncovering  
163 geochemical fractionation of the newly deposited Hg in paddy soil using a stable isotope tracer, *J.*  
164 *Hazard. Mater.*, 433, 128752-128752, <https://doi.org/10.1016/j.jhazmat.2022.128752>, 2022.
- 165 Liu, Y., Johs, A., Li, B., Lu, X., Hu, H., Sun, D. H., He, J. Z., and Gu, B.: Unraveling Microbial  
166 Communities Associated with Methylmercury Production in Paddy Soils, *Environ. Sci. Technol.*, 52,  
167 13110-13118, <https://doi.org/10.1021/acs.est.8b03052>, 2018.
- 168 Shi, J. B., Liang, L. N., Jiang, G. B. and Jin, X. L.: The speciation and bioavailability of mercury in  
169 sediments of Haihe River, China, *Environ. Int.*, 31, 357-365,  
170 <https://doi.org/10.1016/j.envint.2004.08.008>, 2005.
- 171 van Hees, P. A. W., Dahlén, J., Lundström, U. S., Borén, H. and Allard, B.: Determination of low  
172 molecular weight organic acids in soil solution by HPLC, *Talanta*, 48, 173-179,  
173 [https://doi.org/10.1016/S0039-9140\(98\)00236-7](https://doi.org/10.1016/S0039-9140(98)00236-7), 1999.
- 174 Viollier, E., Inglett, P. W., Hunter, K., Roychoudhury, A. N. and Van Cappellen, P.: The ferrozine method  
175 revisited: Fe(II)/Fe(III) determination in natural waters, *Appl. Geochem.*, 15, 785-790,  
176 [https://doi.org/10.1016/S0883-2927\(99\)00097-9](https://doi.org/10.1016/S0883-2927(99)00097-9), 2000.
- 177 Zhang, S., Yin, Y., Yang, P., Yao, C., Tian, S., Lei, P., Jiang, T. and Wang, D.: Using the end-member  
178 mixing model to evaluate biogeochemical reactivities of dissolved organic matter (DOM):  
179 autochthonous versus allochthonous origins, *Water Res.*, 232, 119644,  
180 <https://doi.org/10.1016/j.watres.2023.119644>, 2023.

181
